# Supplementary material
Source: PubMed Central journal article supplement (PMC4041680)
Supplement: supp_the2014-0086_Kimmelman_Wolpin-14-86.pdf [file supp_the2014-0086_Kimmelman_Wolpin-14-86.pdf]

## Overview

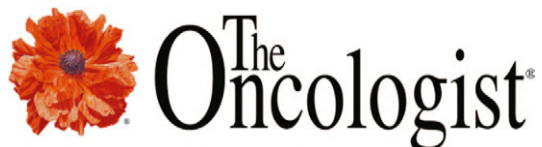

The official journal of the Society for Translational Oncology

**First Published Online May 12, 2014**

**DOI:** 10.1634/theoncologist.2014-0086

**Title:** Phase II and Pharmacodynamic Study of Autophagy Inhibition Using Hydroxychloroquine in Patients With Metastatic Pancreatic Adenocarcinoma

**Authors:** Brian M. Wolpin,<sup>a,b</sup> Douglas A. Rubinson,<sup>a,b</sup> Xiaoxu Wang,<sup>a,b</sup> Jennifer A. Chan,<sup>a,b</sup> James M. Cleary,<sup>a,b</sup> Peter C. Enzinger,<sup>a,b</sup> Charles S. Fuchs,<sup>a,b</sup> Nadine J. McCleary,<sup>a,b</sup> Jeffrey A. Meyerhardt,<sup>a,b</sup> Kimmie Ng,<sup>a,b</sup> Deborah Schrag,<sup>a,b</sup> Allison L. Sikora,<sup>a,b</sup> Beverly A. Spicer,<sup>a,b</sup> Leah Killion,<sup>a,b</sup> Harvey Mamon,<sup>a,b</sup> Alec C. Kimmelman<sup>a,b</sup>

<sup>a</sup>Dana-Farber Cancer Institute, Boston, Massachusetts, USA; <sup>b</sup>Brigham and Women's Hospital, Boston, Massachusetts, USA

**ClinicalTrials.gov Identifier:** NCT01273805

**Sponsor(s):** Dana-Farber Cancer Institute

**Principal Investigators:** Brian Wolpin

**IRB Approved:** Yes

### Disclosures

**Charles S. Fuchs:** Genentech, Eli Lilly, Takeda, Momenta Pharm, Amgen, Acceleron, Sanofi, Metamark Genetics (C/A); **Deborah Schrag:** New Century Health, Ohio State University (C/A); **Alec C. Kimmelman:** Forma Therapeutics (C/A). The other authors indicated no financial relationships.

(C/A) Consulting/advisory relationship; (RF) Research funding; (E) Employment; (ET) Expert testimony; (H) Honoraria received; (OI) Ownership interests; (IP) Intellectual property rights/inventor/patent holder; (SAB) Scientific advisory board

## Author Summary: Abstract and Brief Discussion

### Background

Autophagy is a catabolic pathway that permits cells to recycle intracellular macromolecules, and its inhibition reduces pancreatic cancer growth in model systems. We evaluated hydroxychloroquine (HCQ), an inhibitor of autophagy, in patients with pancreatic cancer and analyzed pharmacodynamic markers in treated patients and mice.

### Methods

Patients with previously treated metastatic pancreatic cancer were administered HCQ at 400 mg ( $n = 10$ ) or 600 mg ( $n = 10$ ) twice daily. The primary endpoint was 2-month progression-free survival (PFS). We analyzed peripheral lymphocytes from treated mice to identify pharmacodynamic markers of autophagy inhibition that were then assessed in peripheral lymphocytes from patients.

### Results

Among 20 patients enrolled, 2 (10%) were without progressive disease at 2 months. Median PFS and overall survival were 46.5 and 69.0 days, respectively. Treatment-related grade 3/4 adverse events were lymphopenia ( $n = 1$ ) and elevated alanine aminotransferase ( $n = 1$ ). Tolerability and efficacy were similar at the two dose levels. Analysis of treated murine lymphocytes suggested that LC3-II expression by Western blot is a reliable marker for autophagy inhibition. Analysis of LC3-II in patient lymphocytes demonstrated inconsistent autophagy inhibition.

## Conclusion

Mouse studies identified LC3-II levels in peripheral lymphocytes as a potential pharmacodynamic marker of autophagy inhibition. In patients with previously treated metastatic pancreatic cancer, HCQ monotherapy achieved inconsistent autophagy inhibition and demonstrated negligible therapeutic efficacy.

## Discussion

Autophagy is a catabolic pathway that permits cells to recycle intracellular macromolecules and organelles [1, 2]. The role of autophagy in cancer is complex and likely is dependent on tumor type, genetic landscape, and phase of tumorigenesis [2–4]. Nevertheless, a subset of malignancies require autophagy for growth and survival [1]. Pancreatic cancers have high basal levels of autophagy, and inhibition of autophagy impeded their growth in vitro and in mouse models [5]. Chloroquine (CQ) and hydroxychloroquine (HCQ) inhibit autophagy in vitro [5–7]. We conducted a phase II clinical trial and translational study of HCQ in patients with previously treated metastatic pancreatic cancer. Concurrently, we examined peripheral lymphocytes from CQ-treated mice to identify pharmacodynamic markers of autophagy inhibition. With more than 35 trials assessing HCQ as cancer therapy, it is paramount to identify reliable pharmacodynamic markers in humans.

In mice receiving CQ at doses sufficient to inhibit autophagy in tumors and to cause tumor regression, we noted increased levels of LC3-II, but not p62, in peripheral lymphocytes and hepatocytes. This suggests that monitoring LC3-II levels in human peripheral lymphocytes may provide a useful pharmacodynamic marker for monitoring autophagy inhibition. In our patients, HCQ at 800 mg or 1,200 mg daily resulted in inconsistent autophagy inhibition, as measured by LC3-II in peripheral lymphocytes. Furthermore, the 2-month PFS rate of 10% was inadequate to justify further studies of single-agent HCQ in this patient population.

Several mechanisms may explain the lack of efficacy for HCQ. First, autophagy inhibition alone in metastatic human pancreatic cancer may not be sufficient to affect tumor growth. Indeed, studies have suggested that autophagy inhibition can act synergistically with cytotoxic chemotherapy [6, 8]. Second, autophagy inhibition at the HCQ doses tested appeared inconsistent when assessed in circulating lymphocytes. Consequently, the doses tested may not adequately inhibit autophagy within tumors. The use of HCQ with concurrent chemotherapy may obviate the need for complete autophagy inhibition in tumors, and such trials are ongoing. Optimization of HCQ dosing or administration of more potent inhibitors may also be necessary in future studies. Third, this study was conducted in patients who received multiple lines of prior chemotherapy. Given the short survival of patients with previously treated pancreatic cancer, patients may not have received sufficient HCQ to manifest a tumor response. Alternatively, chemotherapy may promote the upregulation of autophagy as a survival mechanism [9], making autophagy inhibition in future lines of therapy more difficult.

Despite our negative efficacy results for HCQ in patients with previously treated metastatic pancreatic cancer, inhibition of autophagy remains an intriguing therapeutic strategy for pancreatic cancer and other tumor types. Successful implementation of this therapeutic approach will require reliable markers of autophagy inhibition, and our data suggest LC3-II as a candidate pharmacodynamic marker for use in clinical trials.

## Trial Information

|                                                         |                                                                                                                                                                                                                                                                                                                                                                                                                                                                                         |
|---------------------------------------------------------|-----------------------------------------------------------------------------------------------------------------------------------------------------------------------------------------------------------------------------------------------------------------------------------------------------------------------------------------------------------------------------------------------------------------------------------------------------------------------------------------|
| <b>Disease:</b>                                         | Pancreatic cancer                                                                                                                                                                                                                                                                                                                                                                                                                                                                       |
| <b>Stage of disease / treatment:</b>                    | Metastatic / Advanced                                                                                                                                                                                                                                                                                                                                                                                                                                                                   |
| <b>Prior Therapy:</b>                                   | 2 prior regimens                                                                                                                                                                                                                                                                                                                                                                                                                                                                        |
| <b>Type of study - 1:</b>                               | Phase II                                                                                                                                                                                                                                                                                                                                                                                                                                                                                |
| <b>Type of study - 2:</b>                               | Single Arm                                                                                                                                                                                                                                                                                                                                                                                                                                                                              |
| <b>Primary Endpoint:</b>                                | Progression Free Survival                                                                                                                                                                                                                                                                                                                                                                                                                                                               |
| <b>Secondary Endpoint:</b>                              | Overall Response Rate                                                                                                                                                                                                                                                                                                                                                                                                                                                                   |
| <b>Secondary Endpoint:</b>                              | Overall Survival                                                                                                                                                                                                                                                                                                                                                                                                                                                                        |
| <b>Additional Details of Endpoints or Study Design:</b> | Patients were eligible if they had a diagnosis of metastatic pancreatic cancer and had received one or two lines of prior therapy for metastatic disease.<br>The primary endpoint of this trial was the 2-month progression-free survival. For the purposes of this endpoint, patients were considered to have progressed if they either demonstrated objective evidence of progression on computed tomography (CT) scan or they demonstrated clinical deterioration resulting in their |

withdrawal from the trial. For the purposes of calculating the progression-free survival, time of progression was either the date of objective progression on CT scan or the time of death for patient's with clinical deterioration resulting in withdrawal from the trial.

**Investigator's Analysis:**

Evidence of target inhibition but no or minimal antitumor activity

## Drug Information

**Drug 1:**

**Generic/Working name:** Hydroxychloroquine

**Trade name:** Plaquenil

**Company name:**

**Drug type:** Small molecule

**Drug class:** Other

**Dose:** 400 mg or 600 mg per flat dose

**Route:** oral (po)

**Schedule of Administration:** Twice daily on a continuous dosing regimen.

## Patient Characteristics

Number of patients, male: 11

Number of patients, female: 9

Stage: Stage IV

Age: Median (range): 67 (56–83)

Number of prior systemic therapies: Median (range): 2 (1–2)

Performance Status: ECOG

- 0 – 2
- 1 – 13
- 2 – 5
- 3 – 0
- Unknown – 0

Other: Not collected

Cancer Types or Histologic Subtypes: • Pancreatic cancer: 20

## Primary Assessment Method

### Experimental Arm: Total Patient Population

Number of patients screened: 22

Number of patients enrolled: 20

Number of patients evaluable for toxicity: 20

Number of patients evaluated for efficacy: 20

Evaluation method: Other

Response assessment CR: 0%

Response assessment PR: 0%

Response assessment SD: 10%

Response assessment PD: 55%

Response assessment other: 35%

(Median) duration assessments PFS: 46.5 days, CI: 33–61

**(Median) duration assessments OS:** 69.0 days, CI: 40–184  
**(Median) duration assessments duration of treatment:** 34 days

| Kaplan-Meier time units: days                     |                |              |                                       |                |                                    |
|---------------------------------------------------|----------------|--------------|---------------------------------------|----------------|------------------------------------|
| Time of scheduled assessment and/or time of event | No. progressed | No. censored | Percent at start of evaluation period | Kaplan-Meier % | No. at next evaluation/No. at risk |
| 13                                                | 1              | 0            | 100.00                                | 95.00          | 19                                 |
| 15                                                | 1              | 0            | 95.00                                 | 90.00          | 18                                 |
| 17                                                | 1              | 0            | 90.00                                 | 85.00          | 17                                 |
| 19                                                | 1              | 0            | 85.00                                 | 80.00          | 16                                 |
| 27                                                | 1              | 0            | 80.00                                 | 75.00          | 15                                 |
| 33                                                | 1              | 0            | 75.00                                 | 70.00          | 14                                 |
| 34                                                | 1              | 0            | 70.00                                 | 65.00          | 13                                 |
| 38                                                | 1              | 0            | 65.00                                 | 60.00          | 12                                 |
| 43                                                | 1              | 0            | 60.00                                 | 55.00          | 11                                 |
| 46                                                | 1              | 0            | 55.00                                 | 50.00          | 10                                 |
| 47                                                | 1              | 0            | 50.00                                 | 45.00          | 9                                  |
| 56                                                | 3              | 0            | 45.00                                 | 30.00          | 6                                  |
| 62                                                | 2              | 0            | 30.00                                 | 20.00          | 4                                  |
| 69                                                | 1              | 0            | 20.00                                 | 15.00          | 3                                  |
| 84                                                | 1              | 0            | 15.00                                 | 10.00          | 2                                  |
| 91                                                | 2              | 0            | 10.00                                 | 0.00           | 0                                  |

### Kaplan-Meier plot legend

|                                                                 |    |    |    |    |    |    |    |    |    |    |    |    |    |    |    |    |
|-----------------------------------------------------------------|----|----|----|----|----|----|----|----|----|----|----|----|----|----|----|----|
| <b>Time of scheduled assessment and/or time of event (days)</b> | 13 | 15 | 17 | 19 | 27 | 33 | 34 | 38 | 43 | 46 | 47 | 56 | 62 | 69 | 84 | 91 |
| <b>No. at risk</b>                                              | 19 | 18 | 17 | 16 | 15 | 14 | 13 | 12 | 11 | 10 | 9  | 6  | 4  | 3  | 0  | 0  |
| Total Patient Population                                        |    |    |    |    |    |    |    |    |    |    |    |    |    |    |    |    |
| <b>No. censored</b>                                             | 0  | 0  | 0  | 0  | 0  | 0  | 0  | 0  | 0  | 0  | 0  | 0  | 0  | 0  | 0  | 0  |
| Total Patient Population                                        |    |    |    |    |    |    |    |    |    |    |    |    |    |    |    |    |

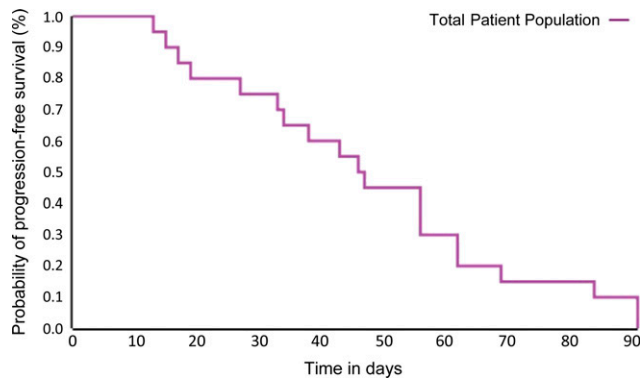

Kaplan-Meier curve for progression-free survival of all patients treated with hydroxychloroquine.

## Adverse Events

| Name                                 | *NC/NA | 1   | 2   | 3  | 4  | 5  | All Grades |
|--------------------------------------|--------|-----|-----|----|----|----|------------|
| Pruritus                             | 90%    | 5%  | 5%  | 0% | 0% | 0% | 10%        |
| Edema face                           | 95%    | 5%  | 0%  | 0% | 0% | 0% | 5%         |
| Alkaline phosphatase increased       | 85%    | 5%  | 10% | 0% | 0% | 0% | 15%        |
| Alanine aminotransferase increased   | 90%    | 5%  | 0%  | 5% | 0% | 0% | 10%        |
| Aspartate aminotransferase increased | 85%    | 10% | 5%  | 0% | 0% | 0% | 15%        |
| Rash maculo-papular                  | 95%    | 5%  | 0%  | 0% | 0% | 0% | 5%         |
| Constipation                         | 95%    | 5%  | 0%  | 0% | 0% | 0% | 5%         |
| Anorexia                             | 75%    | 25% | 0%  | 0% | 0% | 0% | 25%        |
| Fatigue                              | 80%    | 10% | 10% | 0% | 0% | 0% | 20%        |
| Flatulence                           | 95%    | 5%  | 0%  | 0% | 0% | 0% | 5%         |
| Diarrhea                             | 70%    | 15% | 15% | 0% | 0% | 0% | 30%        |
| Abdominal pain                       | 90%    | 10% | 0%  | 0% | 0% | 0% | 10%        |
| Nausea                               | 75%    | 15% | 10% | 0% | 0% | 0% | 25%        |
| Vomiting                             | 80%    | 10% | 10% | 0% | 0% | 0% | 20%        |
| Anemia                               | 95%    | 0%  | 5%  | 0% | 0% | 0% | 5%         |
| Lymphocyte count decreased           | 95%    | 0%  | 0%  | 5% | 0% | 0% | 5%         |
| Blurred vision                       | 95%    | 5%  | 0%  | 0% | 0% | 0% | 5%         |
| Blood bilirubin increased            | 95%    | 5%  | 0%  | 0% | 0% | 0% | 5%         |
| Hyperglycemia                        | 95%    | 0%  | 5%  | 0% | 0% | 0% | 5%         |
| Hypoalbuminemia                      | 95%    | 5%  | 0%  | 0% | 0% | 0% | 5%         |

\*No Change from Baseline/No Adverse Event

All treatment-related adverse events deemed by provider to be possibly, probably or definitely related to the study drug.

## Serious Adverse Events

| Name                              | Grade | Attribution |
|-----------------------------------|-------|-------------|
| Elevated alanine aminotransferase | 3     | Possible    |
| Lymphopenia                       | 3     | Possible    |

### Notes

Inhibition of autophagy: As no method to monitor autophagy inhibition in vivo is universally accepted, we performed experiments in mice simultaneously with the human trial to assess the robustness of various autophagy markers. In the mouse and human studies, peripheral lymphocytes were evaluated for autophagy inhibition, as a surrogate tissue to monitor inhibition in tumor cells. We focused on two of the most widely utilized markers in preclinical studies, LC3 and p62. The lipidated form of LC3, known as LC3-II, is incorporated into the membrane of autophagosomes and is a commonly used marker of autophagy activation which can be monitored as a faster migrating band on SDS-PAGE gels. As CQ and HCQ inhibit autophagy by blocking the degradation of autophagosomes, effective inhibition would result in an increase in LC3. Similarly, p62 is an autophagy receptor, which is degraded by autophagy. Thus, CQ and HCQ would be expected to increase its levels if autophagy is sufficiently inhibited. Our prior studies showed that treating mice daily with intraperitoneal CQ at a dose of 60 mg/kg resulted in impairment of autophagy and marked regression of pancreatic cancer xenografts. Therefore, we treated a cohort of mice with this dose and an additional cohort of mice with saline as a control. Western blot analysis was then performed using antibodies to LC3 and p62 and normalized to  $\beta$ -actin as a loading control to assess autophagy inhibition in peripheral tissues. CQ treatment resulted in an increase in LC3 levels in the majority of samples analyzed when compared with saline treated controls, including two of the three pooled groups of lymphocyte samples. Interestingly, p62 levels were largely unchanged in the lymphocyte samples, suggesting that this marker was not optimal for monitoring autophagy in this cell type under these conditions. Therefore, we chose to focus on LC3-II as a pharmacodynamic marker for the patient samples. Additionally, given the sample variability we chose a cutoff of a twofold increase in LC3-II as positive for autophagy inhibition. In the 400 mg b.i.d. cohort of patients, there were four assessable patients with blood collected while receiving HCQ, due to many patients having rapidly progressive malignancy. However, only one patient showed an increase in LC3-II levels at this dose of HCQ. At the 600 mg b.i.d. dose, nine patients were evaluable with more than one blood sample of

sufficient quantity available while receiving treatment with HCQ. Four of the nine patients showed increased LC3-II levels on serial blood draws, suggesting that autophagy inhibition is achievable in patients treated with HCQ, although this was not consistent across the patient population.

## Assessment, Analysis, and Discussion

|                                             |                                                                    |
|---------------------------------------------|--------------------------------------------------------------------|
| <b>Completion:</b>                          | Study completed                                                    |
| <b>Pharmacokinetics / Pharmacodynamics:</b> | Correlative Endpoints Not Met                                      |
| <b>Investigator's Assessment:</b>           | Evidence of target inhibition but no or minimal antitumor activity |

### Discussion

Macroautophagy (referred to as “autophagy”) is a catabolic pathway that permits cells to recycle intracellular macromolecules and organelles [1, 2]. Autophagy permits regeneration of anabolic substrates, protects cells from the accumulation of reactive oxygen species (ROS), and maintains oxidative phosphorylation in the cell. In a highly regulated pathway, structures targeted for recycling and degradation are surrounded by a double-membrane autophagosome. The autophagosome then fuses with a lysosome in which the enveloped structures are catabolized. Chloroquine (CQ) and its derivatives, such as hydroxychloroquine (HCQ), passively diffuse into the lysosome, where they undergo protonation and become trapped. By accepting protons, these medications increase lysosomal pH, inhibiting the degradation of the autophagosome and its contents [7, 10]. Because of these effects, studies have demonstrated that CQ and HCQ inhibit the process of autophagy *in vitro* [5–7].

The role of autophagy in cancer is complex and likely is dependent on tumor type, genetic landscape, and phase of tumorigenesis [2–4]. Nevertheless, a subset of advanced malignancies requires autophagy for growth and survival [1]. Pancreatic cancers have high basal levels of autophagy, and inhibition of autophagy altered their metabolism, increased ROS, and impeded *in vitro* growth [5]. Furthermore, administration of CQ inhibited growth of pancreatic cancer xenografts and the formation and progression of pancreatic cancers in an autochthonous model of the disease [5]. Interestingly, additional studies have suggested that dependence on autophagy may be a general property of Ras-driven cancers [4, 11, 12]. Given these encouraging laboratory data, we designed a clinical trial to assess the safety and efficacy of HCQ in patients with previously treated metastatic pancreatic cancer. In addition, pharmacodynamic markers of autophagy inhibition were investigated in mice and then applied to clinical samples from the treated patients.

Because no method to monitor autophagy inhibition *in vivo* is universally accepted, we performed experiments in mice simultaneously with the human trial to assess the robustness of various autophagy markers. For translation to the human study, peripheral lymphocytes and liver tissue from mice were evaluated for autophagy inhibition, as surrogates to monitor inhibition in tumor cells. We focused on two of the most widely utilized markers in preclinical studies, LC3 and p62. CQ treatment in C57BL6 mice at doses known to inhibit tumor growth [5] resulted in an increase in LC3-II levels in the majority of lymphocyte and liver tissue samples analyzed when compared with saline-treated controls, consistent with inhibition of autophagy in these peripheral tissues. In contrast, p62 levels were largely unchanged, suggesting that this marker was not optimal under these conditions. Consequently, we noted inhibition of autophagy in mouse peripheral lymphocytes at doses of CQ known to inhibit tumor growth, prompting the measurement of LC3-II as a pharmacodynamic marker in our patient blood samples.

A total of 20 patients were enrolled in the clinical study; the first 10 patients received HCQ at 400 mg twice daily, and the next 10 patients received HCQ at 600 mg twice daily on a continuous dosing regimen. All patients received at least one prior line of chemotherapy for treatment of metastatic disease, with 14 patients (70%) receiving two prior lines of therapy. In our patient samples, autophagy inhibition in peripheral lymphocytes was inconsistent, as assessed by Western blot for LC3-II. In the HCQ 400 mg b.i.d. patient cohort, one of four patients with available pretreatment and on-treatment blood samples had an increase in LC3-II levels in peripheral lymphocytes. In the 600 mg b.i.d. cohort, four of nine patients had increased LC3-II levels in peripheral lymphocytes while receiving HCQ. Consequently, autophagy inhibition appeared achievable in human peripheral tissues as measured by Western blot for LC3-II, but inhibition was inconsistent across patients. Because more than 35 trials are described at [ClinicalTrials.gov](https://ClinicalTrials.gov) as assessing HCQ as a cancer therapy, it is paramount to identify reliable pharmacodynamic markers in humans and to ensure that the doses of HCQ used are sufficient to inhibit autophagy in target tissues.

Although few treatment-related adverse events were noted among the 20 patients treated with HCQ at either dose, the observed 2-month PFS rate of 10% fell below the prespecified rate considered adequate to justify further studies of single-agent HCQ in this patient population. Furthermore, no partial responses were seen, and progression-free and overall

survival times were short. Several potential mechanisms may underlie the lack of HCQ activity in this study. First, autophagy inhibition in metastatic human pancreatic cancer may not be sufficient to affect tumor growth. Indeed, inhibition of autophagy has been demonstrated to have both pro- and antitumorigenic effects dependent on tumor type, stage, and context [2]. Second, inhibition of autophagy at the HCQ doses tested appeared incomplete and inconsistent when assessed in circulating lymphocytes. Consequently, the doses of HCQ tested may not have adequately inhibited autophagy in tumors. This is of particular importance with HCQ as a monotherapy because autophagy inhibition would likely need to be complete to see therapeutic efficacy. Further optimization of HCQ dosing to more completely inhibit autophagy or administration of more potent inhibitors may be necessary in future studies. Finally, this study was conducted in patients who received multiple lines of prior chemotherapy. Given the short survival of patients with previously treated pancreatic cancer, patients may not have received sufficient HCQ to manifest a tumor response. Alternatively, chemotherapy has been shown to promote the upregulation of autophagy as a survival mechanism [9]; the development of resistance to prior chemotherapy could reflect, in part, upregulation of autophagy, thereby making subsequent inhibition more difficult.

Despite the negative efficacy results of HCQ in our patients with previously treated metastatic pancreatic cancer, inhibition of autophagy remains an intriguing therapeutic strategy for pancreatic cancer and other tumor types. Additional clinical trials of HCQ in combination with either chemotherapy or chemoradiotherapy are being conducted in patients with pancreatic cancer (ClinicalTrials.gov identifiers NCT01506973, NCT01128296, and NCT01494155). Interestingly, laboratory studies suggest that autophagy inhibition can act synergistically with cytotoxic chemotherapy; therefore, combination therapy may not require complete inhibition of autophagy. The results of ongoing trials should further inform whether autophagy inhibition will be a useful strategy in the treatment of patients with pancreatic cancer.

## Acknowledgments

Brian M. Wolpin is supported by NIH Grant K07 CA140790 from the National Cancer Institute, an American Society of Clinical Oncology Career Development Award, a Howard Hughes Medical Institute Early Career Physician-Scientist Award, the Lustgarten Foundation, and Promises for Purple. Alec C. Kimmelman is supported by NIH Grant 1R01CA157490 from the National Cancer Institute, American Cancer Society Grant RSG-13-298-01-TBG, a Department of Defense Discovery Award (W81XWH-12-1-0459), and the Lustgarten Foundation for Pancreatic Cancer Research. Charles S. Fuchs is supported by NIH Grant 1R01CA124908 and P50127003 from the National Cancer Institute and the Robert T. and Judith B. Hale Fund for Pancreatic Cancer Research. Brian M. Wolpin and Douglas A. Rubinson contributed equally to this work.

## References

1. Choi AM, Ryter SW, Levine B. Autophagy in human health and disease. *N Engl J Med* 2013;368:651–662.
2. Kimmelman AC. The dynamic nature of autophagy in cancer. *Genes Dev* 2011;25:1999–2010.
3. Amaravadi RK, Lippincott-Schwartz J, Yin XM et al. Principles and current strategies for targeting autophagy for cancer treatment. *Clin Cancer Res* 2011;17:654–666.
4. White E. Deconvoluting the context-dependent role for autophagy in cancer. *Nat Rev Cancer* 2012;12:401–410.
5. Yang S, Wang X, Contino G et al. Pancreatic cancers require autophagy for tumor growth. *Genes Dev* 2011;25:717–729.
6. Amaravadi RK, Yu D, Lum JJ et al. Autophagy inhibition enhances therapy-induced apoptosis in a Myc-induced model of lymphoma. *J Clin Invest* 2007;117:326–336.
7. Rubinsztein DC, Gestwicki JE, Murphy LO et al. Potential therapeutic applications of autophagy. *Nat Rev Drug Discov* 2007;6:304–312.
8. Selvakumaran M, Amaravadi RK, Vasilevska IA et al. Autophagy inhibition sensitizes colon cancer cells to antiangiogenic and cytotoxic therapy. *Clin Cancer Res* 2013;19:2995–3007.
9. Amaravadi RK, Thompson CB. The roles of therapy-induced autophagy and necrosis in cancer treatment. *Clin Cancer Res* 2007;13:7271–7279.
10. Michihara A, Toda K, Kubo T et al. Disruptive effect of chloroquine on lysosomes in cultured rat hepatocytes. *Biol Pharm Bull* 2005;28:947–951.
11. Lock R, Roy S, Kenific CM et al. Autophagy facilitates glycolysis during Ras-mediated oncogenic transformation. *Mol Biol Cell* 2011;22:165–178.
12. Guo JY, Chen HY, Mathew R et al. Activated Ras requires autophagy to maintain oxidative metabolism and tumorigenesis. *Genes Dev* 2011;25:460–470.

## Figures and Tables

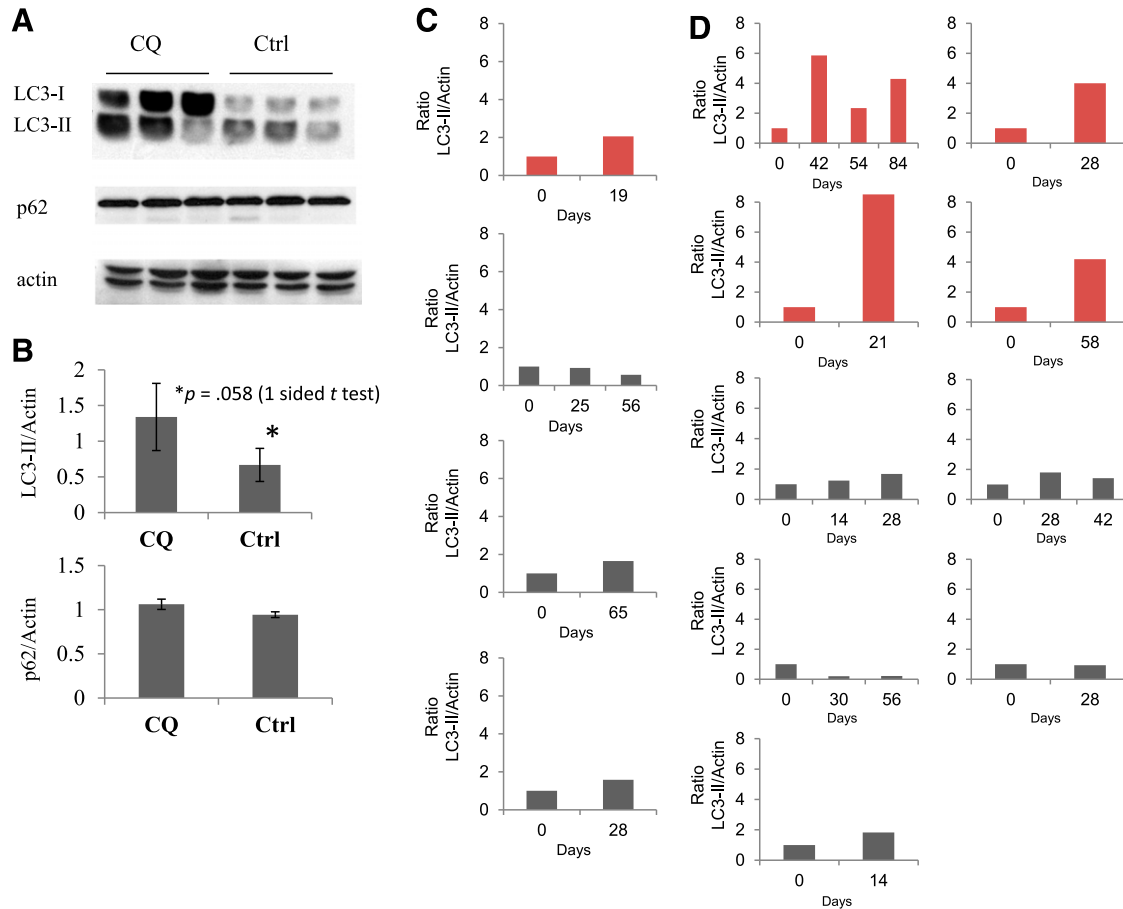

**Figure 1.** Ratio of LC3-II to actin as a biomarker for autophagy inhibition. **(A):** Autophagy inhibition in mouse lymphocytes. A Western blot probed for LC3, p62, and  $\beta$ -actin in the presence (first three lanes) or absence (second three lanes) of CQ treatment. Each lane comprised pooled lymphocyte samples from two to three individual mice treated with drug or control. **(B):** A bar graph displays the relative quantity of LC3-II (upper graph) and p62 (lower graph) as a ratio to  $\beta$ -actin as assessed by densitometry. Autophagy inhibition in circulating lymphocytes from patients receiving hydroxychloroquine (HCQ) at either 400 mg b.i.d. **(C)** or 600 mg b.i.d. **(D)**. Each bar graph reflects results from a single patient prior to treatment (day 0), and then at one time point or more while receiving HCQ. For each patient, a baseline ratio of LC3-II to actin was determined based on assessment by densitometry of Western blot prior to starting (day 0) and then at one time point or more following initiation of HCQ. Graphs in red depict patients with a more than twofold increase in relative LC3-II levels on serial blood draws.

Abbreviation: CQ, chloroquine.

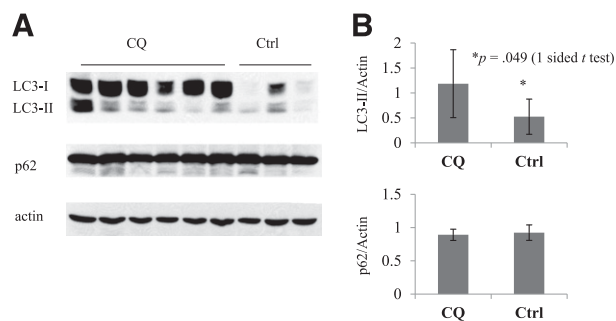

**Figure 2.** Ratio of LC3-II to actin in treated mouse liver. **(A):** Western blot from mouse liver extracts probed for LC3, p62, and  $\beta$ -actin in the presence (first six lanes) or absence (final three lanes) of CQ. **(B):** Relative expression of LC3-II (upper graph) and p62 (lower graph) expressed as a ratio to  $\beta$ -actin as assessed by densitometry.

Abbreviation: CQ, chloroquine.



**Table 1.** Baseline patient and disease characteristics

| <b>Characteristic</b>                 | <b>HCQ 400 mg b.i.d.<br/>(n = 10)</b> | <b>HCQ 600 mg b.i.d.<br/>(n = 10)</b> | <b>Full population<br/>(n = 20)</b> |
|---------------------------------------|---------------------------------------|---------------------------------------|-------------------------------------|
| Age, years, median (range)            | 67.5 (56–83)                          | 66 (58–76)                            | 67 (56–83)                          |
| Sex, no. (%)                          |                                       |                                       |                                     |
| Male                                  | 5 (50)                                | 6 (60)                                | 11 (55)                             |
| Female                                | 5 (50)                                | 4 (40)                                | 9 (45)                              |
| Race/ethnicity, no. (%)               |                                       |                                       |                                     |
| White                                 | 10 (100)                              | 8 (80)                                | 18 (90)                             |
| Other                                 | 0 (0)                                 | 2 (20)                                | 2 (10)                              |
| ECOG performance status, no. (%)      |                                       |                                       |                                     |
| 0                                     | 1 (10)                                | 1 (10)                                | 2 (10)                              |
| 1                                     | 5 (50)                                | 8 (80)                                | 13 (65)                             |
| 2                                     | 4 (40)                                | 1 (10)                                | 5 (25)                              |
| Site of primary tumor, no. (%)        |                                       |                                       |                                     |
| Head or head and body                 | 6 (60)                                | 7 (70)                                | 13 (65)                             |
| Body or tail                          | 4 (40)                                | 3 (30)                                | 7 (35)                              |
| Location of metastases, no. (%)       |                                       |                                       |                                     |
| Liver                                 | 8 (80)                                | 7 (70)                                | 15 (75)                             |
| Lung                                  | 4 (36)                                | 3 (30)                                | 7 (35)                              |
| Peritoneum                            | 4 (40)                                | 5 (50)                                | 9 (45)                              |
| Other                                 | 2 (20)                                | 2 (20)                                | 4 (20)                              |
| Prior treatment, <sup>a</sup> no. (%) |                                       |                                       |                                     |
| Gemcitabine                           | 10 (100)                              | 9 (90)                                | 19 (95)                             |
| Fluorouracil or capecitabine          | 8 (80)                                | 9 (90)                                | 17 (85)                             |
| Oxaliplatin                           | 8 (80)                                | 9 (90)                                | 17 (85)                             |
| Irinotecan                            | 1 (10)                                | 4 (40)                                | 5 (25)                              |
| Other agent                           | 2 (20)                                | 3 (30)                                | 5 (25)                              |
| Radiotherapy                          | 3 (30)                                | 2 (20)                                | 5 (25)                              |
| Baseline CEA, ng/mL, median (range)   | 23.6 (0.5–181.1)                      | 6.6 (0.7–421.6)                       | 8.4 (0.5–421.6)                     |
| Baseline CA19-9, U/mL, median (range) | 2925.2 (44–68911.8)                   | 4303.4 (60.9–240097.4)                | 2925.2 (44–240097.4)                |

<sup>a</sup>Chemotherapy at any time, including neoadjuvant or adjuvant therapy.

Abbreviations: CA19-9, carbohydrate antigen 19-9; CEA, carcinoembryonic antigen; ECOG, Eastern Cooperative Oncology Group; HCQ, hydroxychloroquine.

**Table 2.** Treatment-related adverse events

| Adverse event                       | HCQ 400 mg b.i.d. (n = 10) |         | HCQ 600 mg b.i.d. (n = 10) |         |
|-------------------------------------|----------------------------|---------|----------------------------|---------|
|                                     | Grade 1/2                  | Grade 3 | Grade 1/2                  | Grade 3 |
| Fatigue                             | 3                          | 0       | 1                          | 0       |
| Anorexia                            | 3                          | 0       | 2                          | 0       |
| Constipation                        | 1                          | 0       | 0                          | 0       |
| Diarrhea                            | 1                          | 0       | 5                          | 0       |
| Abdominal pain                      | 1                          | 0       | 1                          | 0       |
| Nausea                              | 0                          | 0       | 5                          | 0       |
| Vomiting                            | 0                          | 0       | 4                          | 0       |
| Leukopenia                          | 1                          | 0       | 0                          | 0       |
| Lymphopenia                         | 0                          | 0       | 0                          | 1       |
| Anemia                              | 0                          | 0       | 1                          | 0       |
| Elevated alanine aminotransferase   | 1                          | 1       | 0                          | 0       |
| Elevated aspartate aminotransferase | 3                          | 0       | 0                          | 0       |
| Elevated alkaline phosphatase       | 3                          | 0       | 0                          | 0       |
| Hyperbilirubinemia                  | 1                          | 0       | 0                          | 0       |
| Hyperglycemia                       | 1                          | 0       | 0                          | 0       |
| Hypoalbuminemia                     | 1                          | 0       | 0                          | 0       |
| Blurred vision                      | 0                          | 0       | 1                          | 0       |
| Pruritus                            | 2                          | 0       | 0                          | 0       |
| Rash, maculopapular                 | 1                          | 0       | 0                          | 0       |
| Facial edema                        | 1                          | 0       | 0                          | 0       |
| Flatulence                          | 0                          | 0       | 1                          | 0       |

Relationship of adverse event considered by treating investigator to be possibly, probably or definitely related to study treatment. No treatment related grade 4 adverse events occurred.

Abbreviation: HCQ, hydroxychloroquine.

**Table 3.** Summary of efficacy results

| Efficacy Endpoint                       | HCQ 400 mg b.i.d. (n = 10), no. (%) | HCQ 600 mg b.i.d. (n = 10), no. (%) | Total (n = 20), no. (%) |
|-----------------------------------------|-------------------------------------|-------------------------------------|-------------------------|
| Primary endpoint                        |                                     |                                     |                         |
| Two-month PFS                           | 1 (10)                              | 1 (10)                              | 2 (10)                  |
| Secondary endpoints                     |                                     |                                     |                         |
| Best overall response                   |                                     |                                     |                         |
| CR                                      | 0                                   | 0                                   | 0                       |
| PR                                      | 0                                   | 0                                   | 0                       |
| SD                                      | 1 (10)                              | 1 (10)                              | 2 (10)                  |
| Progressive disease                     | 6 (60)                              | 5 (50)                              | 11 (55)                 |
| Inadequate assessment <sup>a</sup>      | 3 (30)                              | 4 (40)                              | 7 (35)                  |
| Response rate (CR plus PR)              | 0                                   | 0                                   | 0                       |
| PFS, days, median (95% CI)              | 51.5 (16–66)                        | 44.5 (33–74)                        | 46.5 (33–61)            |
| Overall survival, days, median (95% CI) | 51.5 (24–275)                       | 83.0 (40–178)                       | 69.0 (40–184)           |

<sup>a</sup>Patients who had early death or symptomatic deterioration prior to objective evaluation.

Abbreviations: CI, confidence interval; CR, complete response; HCQ, hydroxychloroquine; PFS, progression-free survival; PR, partial response; SD, stable disease.

[Click here](#) to access other published clinical trials.
